# Supplementary material for: Protective effect of HINT2 on mitochondrial function via repressing MCU complex activation attenuates cardiac microvascular ischemia–reperfusion injury
Source: PubMed Central journal article supplement (PMC8677646; doi:10.1007/s00395-021-00905-4), 2021-12-16

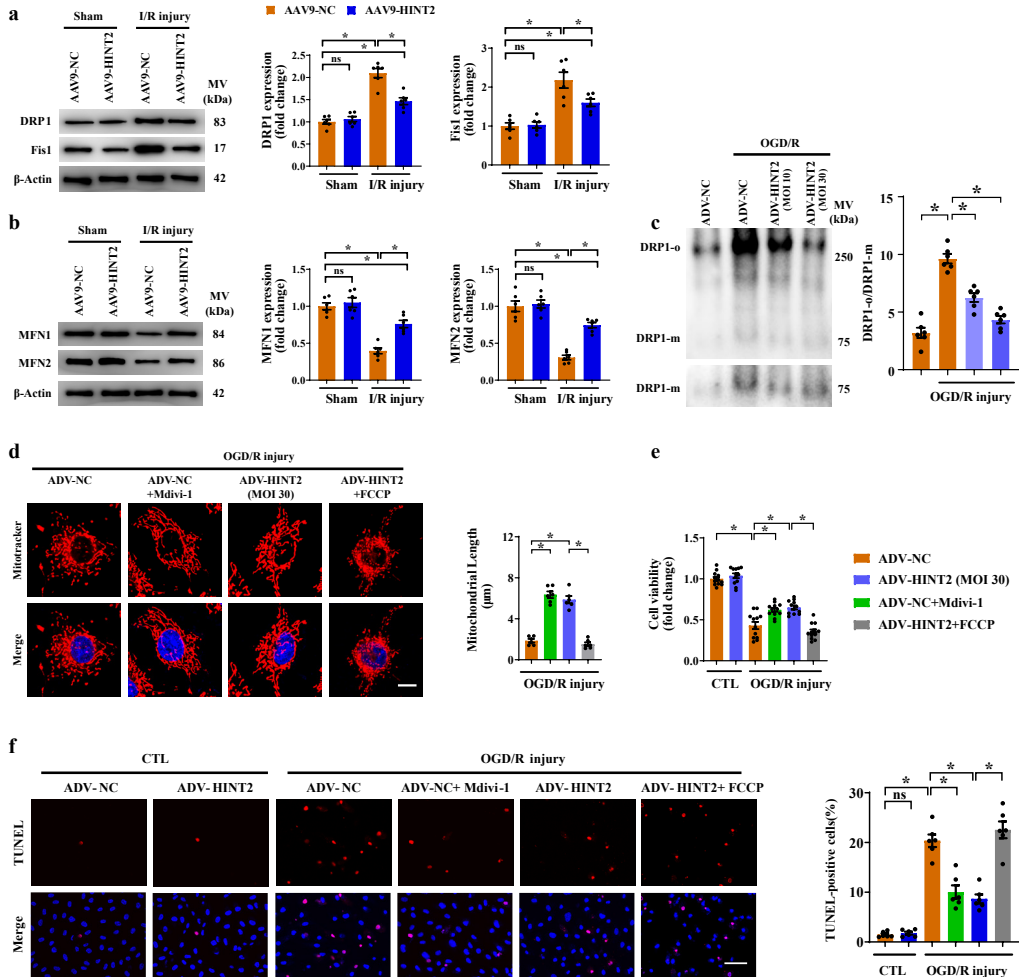

Supplement: 395_2021_905_MOESM2_ESM.pdf [file 395_2021_905_MOESM2_ESM.pdf]
